# Supplementary material for: Blood biomarkers of Hikikomori, a severe social withdrawal syndrome
Source: PubMed Central journal article supplement (PMC5811600; doi:10.1038/s41598-018-21260-w), 2018-02-13
Supplement: 41598_2018_21260_MOESM1_ESM.pdf [file 41598_2018_21260_MOESM1_ESM.pdf]

**Title:** Blood biomarkers of Hikikomori, a severe social withdrawal syndrome

**Authors:**

Kohei Hayakawa, M.D.<sup>1</sup>, Takahiro A. Kato, M.D., Ph.D.<sup>1\*</sup>, Motoki Watabe, Ph.D.<sup>2#</sup>, Alan R. Teo, M.D., M.S.<sup>3&4#</sup>, Hideki Horikawa, M.D., Ph.D.<sup>1</sup>, Nobuki Kuwano, M.D.<sup>1</sup>, Norihiro Shimokawa, M.D.<sup>1</sup>, Mina Sato-Kasai, M.D.<sup>1</sup>, Hiroaki Kubo, M.A.<sup>1</sup>, Masahiro Ohgidani, Ph.D.<sup>1</sup>, Noriaki Sagata, Ph.D.<sup>1</sup>, Hiroyuki Toda, M.D., Ph.D.<sup>5</sup>, Masaru Tateno, M.D., Ph.D.<sup>6</sup>, Naotaka Shinfuku, M.D., Ph.D.<sup>7</sup>, Junji Kishimoto, Ph.D.<sup>8</sup>, Shigenobu Kanba, M.D., Ph.D.<sup>1</sup>

**Affiliations:**

<sup>1</sup> Department of Neuropsychiatry, Graduate School of Medical Sciences, Kyushu University, Fukuoka, Japan

<sup>2</sup> School of Business, Monash University, Jalan Lagoon Selatan, Bandar Sunway, Selangor Darul Ehsan, Malaysia

<sup>3</sup> VA Portland Health Care System, Portland, Oregon, United States of America

<sup>4</sup> Department of Psychiatry, Oregon Health & Science University, Portland, Oregon, United States of America

<sup>5</sup> Department of Psychiatry, National Defense Medical College, Tokorozawa, Saitama, Japan

<sup>6</sup> Department of Neuropsychiatry, Sapporo Medical University, School of Medicine, Sapporo, Hokkaido, Japan

<sup>7</sup> International Center for Medical Research, Kobe University, Kobe, Japan

<sup>8</sup> Department of Research and Development of Next Generation Medicine, Faculty of

Medical Sciences, Kyushu University, Fukuoka, Japan

(#. These authors are equally contributed.)

**\*Correspondence to:**

Takahiro A. Kato, M.D., PhD.

Associate Professor

Department of Neuropsychiatry, Graduate School of Medical Sciences, Kyushu University

Address: Maidashi 3-1-1, Higashi-ku, Fukuoka 812-8582, Japan

Phone: +81-92-642-5627, Fax: +81-92-642-5644

E-mail address: takahiro@npsych.med.kyushu-u.ac.jp

### **Supplementary Table 1**

Avoidant personality score and biomarkers/psychometrics in non-hikikomori volunteers.

### **Supplementary Table 2**

Avoidant personality score and trust game in non-hikikomori volunteers.

### **Supplementary Table 3**

Blood biomarkers and psychometrics/trust game in male non-hikikomori volunteers.

### **Supplementary Table 4**

Blood biomarkers and psychometrics/trust game in female non-hikikomori volunteers.

### **Supplementary Table 5**

Discriminant analysis and ROC curves using candidate biomarkers between individuals with hikikomori and age-matched controls.

### **Supplementary Table 6**

Blood biomarkers and avoidant personality score/psychometrics in male individuals with hikikomori.

### **Supplementary Table 7**

Blood biomarkers and avoidant personality score/psychometrics in female individuals with hikikomori.
